# Supplementary material for: Correction to: Abaloparatide effect on forearm bone mineral density and wrist fracture risk in postmenopausal women with osteoporosis
Source: Springer Nature journal article supplement (doi:10.1007/s00198-020-05469-y), 2020-06-12

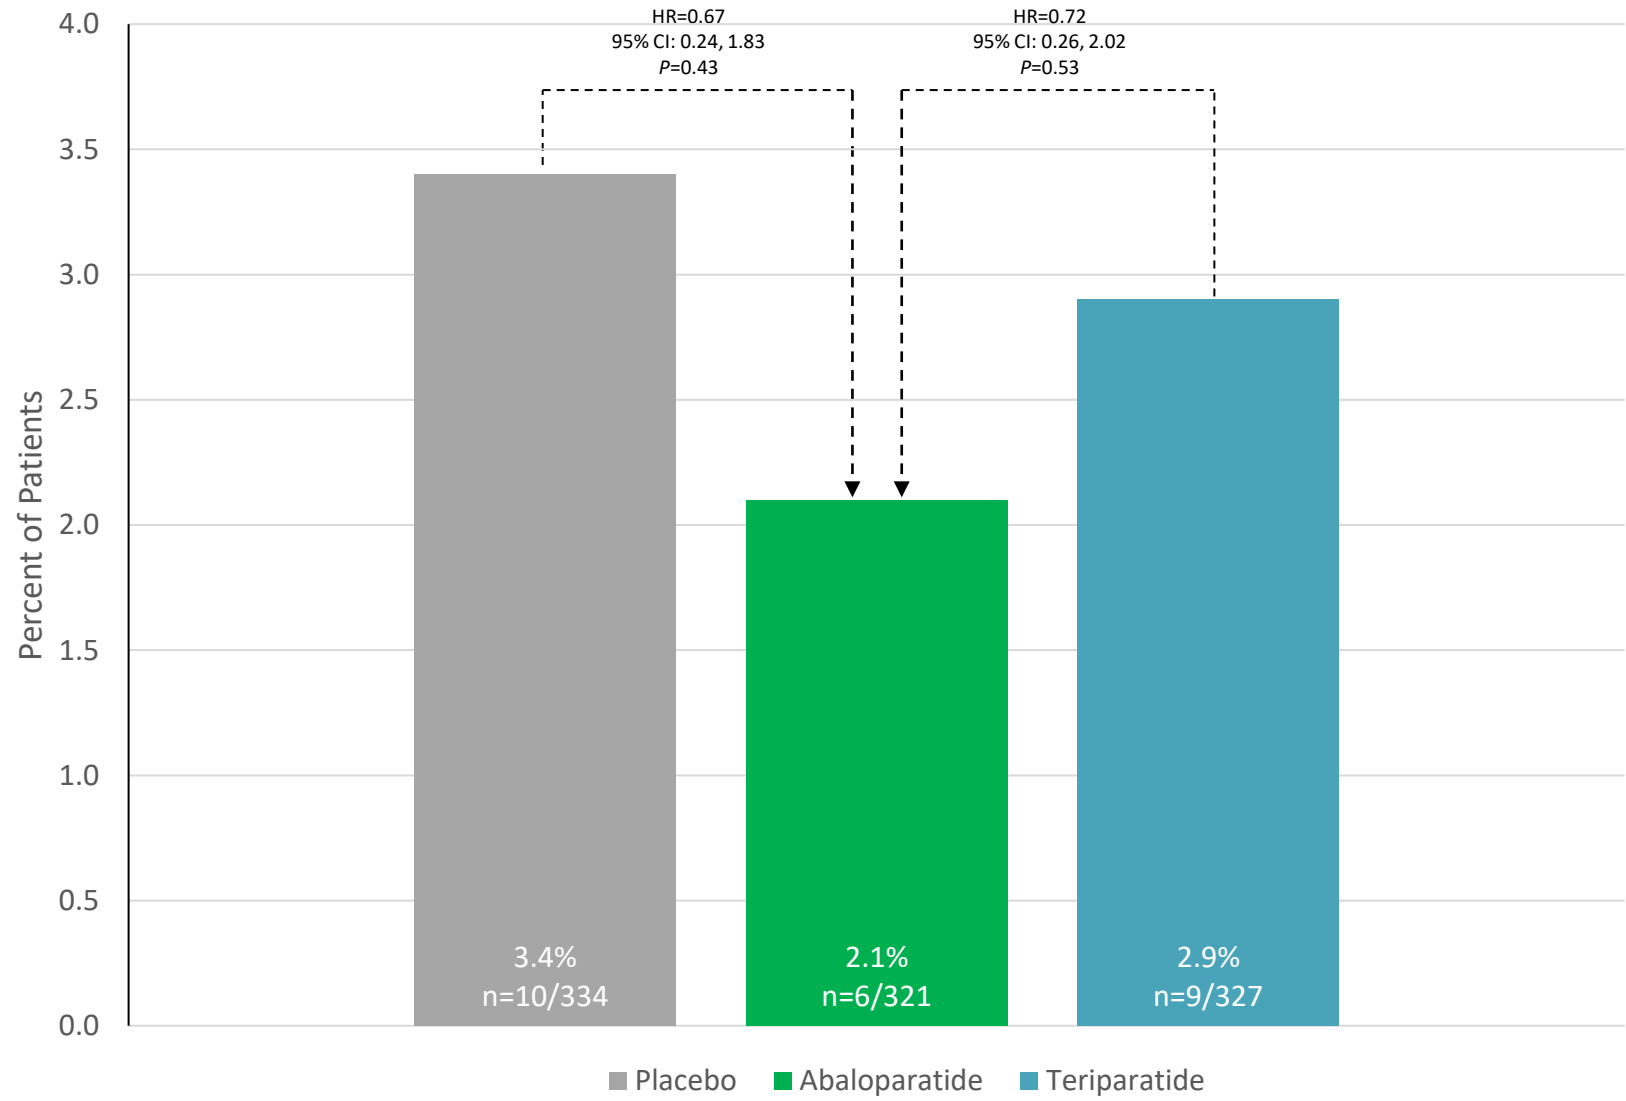

Supplement: MOESM1 [file 18077598]
